# Supplementary material for: Orthogonal colloidal quantum dot inks enable efficient multilayer optoelectronic devices
Source: PubMed Central journal article supplement (PMC7511352; doi:10.1038/s41467-020-18655-7), 2020-09-23
Supplement: 41467_2020_18655_MOESM2_ESM.pdf [file 41467_2020_18655_MOESM2_ESM.pdf]

## Solar Cells Reporting Summary

Nature Research wishes to improve the reproducibility of the work that we publish. This form is intended for publication with all accepted papers reporting the characterization of photovoltaic devices and provides structure for consistency and transparency in reporting. Some list items might not apply to an individual manuscript, but all fields must be completed for clarity.

For further information on Nature Research policies, including our [data availability policy](#), see [Authors & Referees](#).

## ► Experimental design

## Please check: are the following details reported in the manuscript?

## 1. Dimensions

- Area of the tested solar cells  Yes Described in Methods (PV characterization).  
 No
- Method used to determine the device area  Yes Described in Methods (PV characterization). Optical aperture is used to define the active area.  
 No

## 2. Current-voltage characterization

- Current density-voltage (J-V) plots in both forward and backward direction  Yes For perovskite devices, forward and reverse scan are shown in Supplementary Fig. 5. For CQD devices, no hysteresis was observed for all CQD PV devices, including both the EDT devices and BA devices. The hysteresis-free behavior in CQD PVs is also widely-accepted in literatures.  
 No
- Voltage scan conditions  Yes Described in Methods (PV characterization).  
*For instance: scan direction, speed, dwell times*  
 No
- Test environment  Yes Described in Methods (PV characterization). Devices were tested in N<sub>2</sub>. Temperature 25c  
*For instance: characterization temperature, in air or in glove box*  
 No
- Protocol for preconditioning of the device before its characterization  Yes Described in Methods (PV characterization).  
 No
- Stability of the J-V characteristic  Yes For perovskite devices, maximum power point tracking is shown in Supplementary Fig. 5b.  
*Verified with time evolution of the maximum power point or with the photocurrent at maximum power point; see ref. 7 for details.*  
 No

## 3. Hysteresis or any other unusual behaviour

- Description of the unusual behaviour observed during the characterization  Yes  
 No No hysteresis was observed for all CQD PV devices, including both the EDT devices and BA devices. The hysteresis-free behavior in CQD PVs is also widely-accepted in literatures.
- Related experimental data  Yes For perovskite devices, Forward and reverse scan are shown in Supplementary Fig. 5a.  
 No

## 4. Efficiency

- External quantum efficiency (EQE) or incident photons to current efficiency (IPCE)  Yes EQE data is described in Fig. 4.  
 No
- A comparison between the integrated response under the standard reference spectrum and the response measure under the simulator  Yes Described in the manuscript (Fig. 4).  
 No
- For tandem solar cells, the bias illumination and bias voltage used for each subcell  Yes This work is for 4T tandem (PV characterization).  
 No

## 5. Calibration

- Light source and reference cell or sensor used for the characterization  Yes Newport, Class A simulator is used for the measurements (Methods, PV characterization).  
 No

|                                                                                                                                                                                               |                                                                        |                                                                                                                                                                |
|-----------------------------------------------------------------------------------------------------------------------------------------------------------------------------------------------|------------------------------------------------------------------------|----------------------------------------------------------------------------------------------------------------------------------------------------------------|
| Confirmation that the reference cell was calibrated and certified                                                                                                                             | <input checked="" type="checkbox"/> Yes<br><input type="checkbox"/> No | The light intensity was calibrated by reference solar cell by Newport (Methods, PV characterization).                                                          |
| Calculation of spectral mismatch between the reference cell and the devices under test                                                                                                        | <input checked="" type="checkbox"/> Yes<br><input type="checkbox"/> No | Described in Methods (PV characterization).                                                                                                                    |
| <b>6. Mask/aperture</b>                                                                                                                                                                       |                                                                        |                                                                                                                                                                |
| Size of the mask/aperture used during testing                                                                                                                                                 | <input checked="" type="checkbox"/> Yes<br><input type="checkbox"/> No | 0.049 cm <sup>2</sup> aperture. Described in Methods (PV characterization).                                                                                    |
| Variation of the measured short-circuit current density with the mask/aperture area                                                                                                           | <input checked="" type="checkbox"/> Yes<br><input type="checkbox"/> No | Described in Methods (PV characterization). Tested with aperture between solar source and devices.                                                             |
| <b>7. Performance certification</b>                                                                                                                                                           |                                                                        |                                                                                                                                                                |
| Identity of the independent certification laboratory that confirmed the photovoltaic performance                                                                                              | <input type="checkbox"/> Yes<br><input checked="" type="checkbox"/> No | We did not certify our cells.                                                                                                                                  |
| A copy of any certificate(s)<br><i>Provide in Supplementary Information</i>                                                                                                                   | <input type="checkbox"/> Yes<br><input checked="" type="checkbox"/> No | We did not certify our cells.                                                                                                                                  |
| <b>8. Statistics</b>                                                                                                                                                                          |                                                                        |                                                                                                                                                                |
| Number of solar cells tested                                                                                                                                                                  | <input checked="" type="checkbox"/> Yes<br><input type="checkbox"/> No | Total 60 devices were used for statistics described in Fig. 4c.                                                                                                |
| Statistical analysis of the device performance                                                                                                                                                | <input checked="" type="checkbox"/> Yes<br><input type="checkbox"/> No | Variation of device performance are shown in Fig. 4c.                                                                                                          |
| <b>9. Long-term stability analysis</b>                                                                                                                                                        |                                                                        |                                                                                                                                                                |
| Type of analysis, bias conditions and environmental conditions<br><i>For instance: illumination type, temperature, atmosphere humidity, encapsulation method, preconditioning temperature</i> | <input checked="" type="checkbox"/> Yes<br><input type="checkbox"/> No | The stability test at MPP operation conditions under AM 1.5G simulated illumination and nitrogen flow was carried out for unencapsulated solar cells (Fig. 4d) |
